# Supplementary material for: Hsa-miR-329 exerts tumor suppressor function through down-regulation of MET in non-small cell lung cancer
Source: PubMed Central journal article supplement (PMC5008302; doi:10.18632/oncotarget.7517), 2016-02-19
Supplement: oncotarget-07-21510-s001.pdf [file oncotarget-07-21510-s001.pdf]

# Hsa-miR-329 exerts tumor suppressor function through down-regulation of *MET* in non-small cell lung cancer

## Supplementary Material

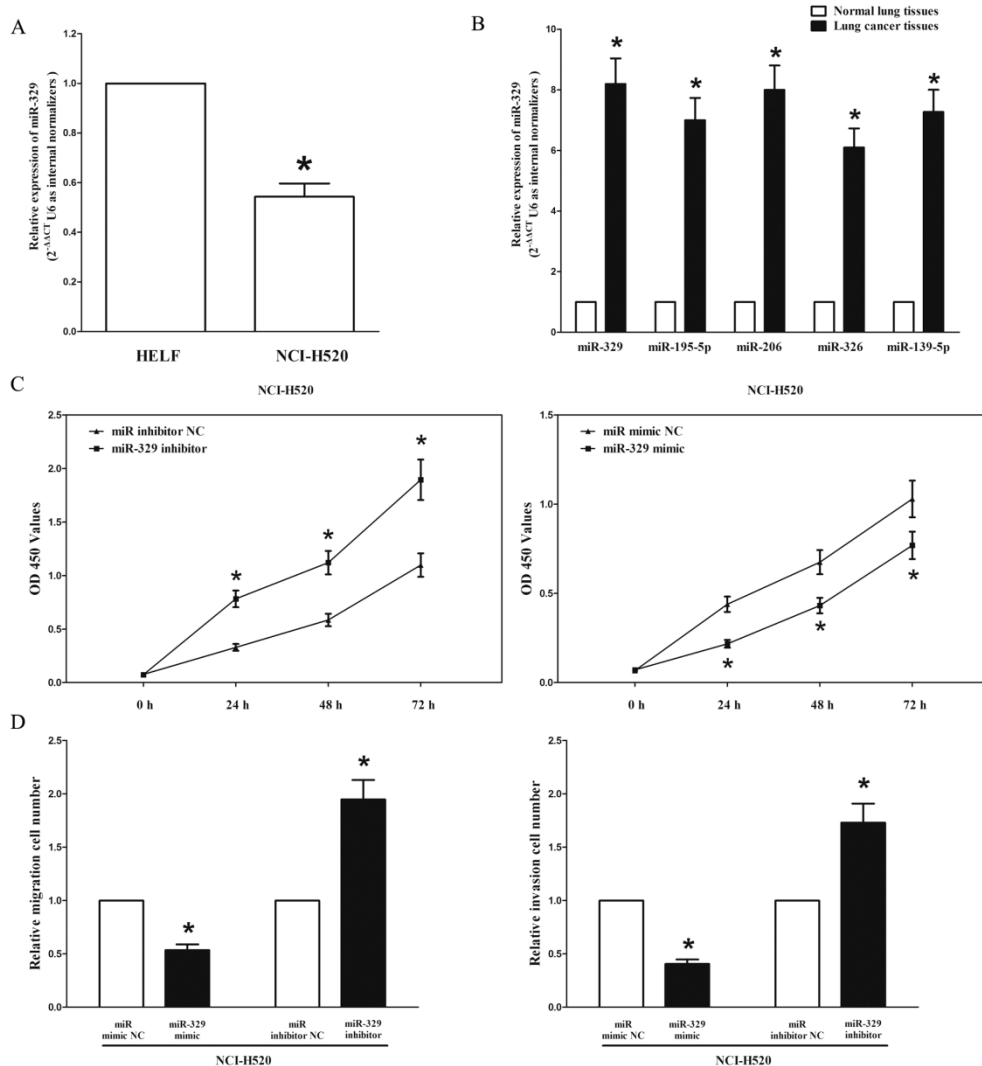

**Fig. S1.** The expression and role of miR-329 in NCI-H520 cells compared with HELF. **A.** The expression of miR-329 in HELF and NCI-H520 cells. **B.** The expression of miR-329, miR-206, miR-195-5p, miR-326 and miR-139-5p in primary lung cancer tissues and matched adjacent normal lung tissues. **C.** CCK8 assays of

NCI-H520 cells after transfected with miR-329 mimic, miR-329 mimic NC, miR-329 inhibitor, miR-329 inhibitor NC. **D.** NCI-H520 cells were loaded onto the top well of a transwell inserts for cell migration/invasion assay. After twenty four hours, cells that migrated to the bottom chamber containing serum-supplemented medium were stained with 0.1% crystal violet, visualized under a phase-contrast microscope, and photographed. Total number of cells in five fields was counted manually.

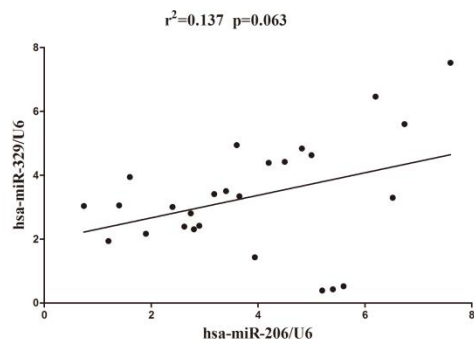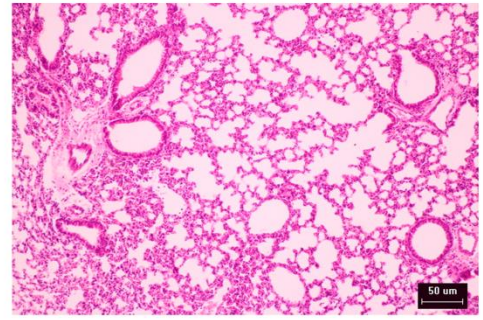

Adjacent normal lung tissues

**Fig. S2.** Scatter plots showing there is no significance between the expression of miR-329 and miR-206.
